# Supplementary material
Source: Royal Society of Chemistry journal article supplement (doi:10.1039/d6cp00324a)
Supplement: d6cp00324a1.pdf [file d6cp00324a1.pdf]

## Supplementary Information

Ion dynamics in *closo*-hydroborates  $\text{Ag}_2[\text{B}_{10}\text{H}_{10}]$  and  $\text{Tl}_2[\text{B}_{10}\text{H}_{10}]$ :  
 $^1\text{H}$ ,  $^{11}\text{B}$  and  $^{205}\text{Tl}$  NMR studies

Olga A. Babanova,<sup>ab</sup> Roman V. Skoryunov,<sup>a</sup> Alexei V. Soloninin,<sup>a</sup> Varvara  
V. Avdeeva,<sup>c</sup> Svetlana E. Nikiforova,<sup>c</sup> Irina V. Kozerzhets,<sup>c</sup> Elena A.  
Malinina,<sup>c</sup> and Alexander V. Skripov<sup>\*a</sup>

<sup>a</sup> *Institute of Metal Physics, Ural Branch of the Russian Academy of Sciences,  
Ekaterinburg 620108, Russia*

<sup>b</sup> *Ural Federal University, Ekaterinburg 620002, Russia*

<sup>c</sup> *N.S. Kurnakov Institute of General and Inorganic Chemistry, Russian Academy of  
Sciences, Moscow 119991, Russia*

\* Corresponding author. E-mail: [skripov@imp.uran.ru](mailto:skripov@imp.uran.ru)

**Table S1.** Results of the elemental analysis for  $\text{Ag}_2[\text{B}_{10}\text{H}_{10}]$

| Elements      | H    | B     | Ag    |
|---------------|------|-------|-------|
| Calc. (wt. %) | 3.02 | 32.38 | 64.61 |
| Exp. (wt. %)  | 2.97 | 32.35 | 64.59 |

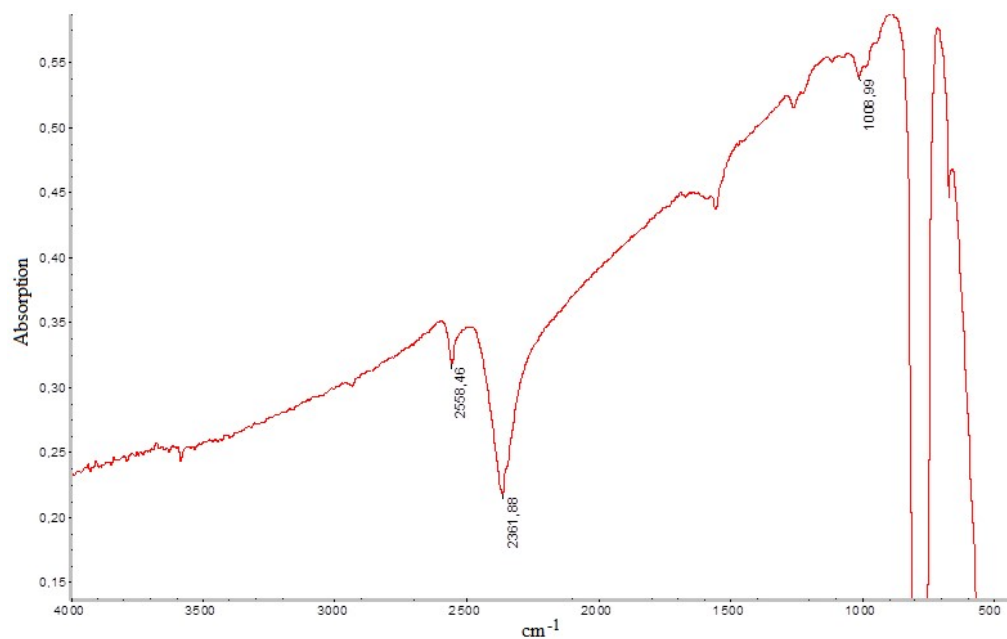

**Fig. S1.** IR spectrum of  $\text{Ag}_2[\text{B}_{10}\text{H}_{10}]$ :  $\nu(\text{BH})_{\text{MHB}} = 2558 \text{ cm}^{-1}$ ,  $\nu(\text{BH}) = 2362 \text{ cm}^{-1}$ ,  $\delta(\text{BBH}) = 1009 \text{ cm}^{-1}$ .

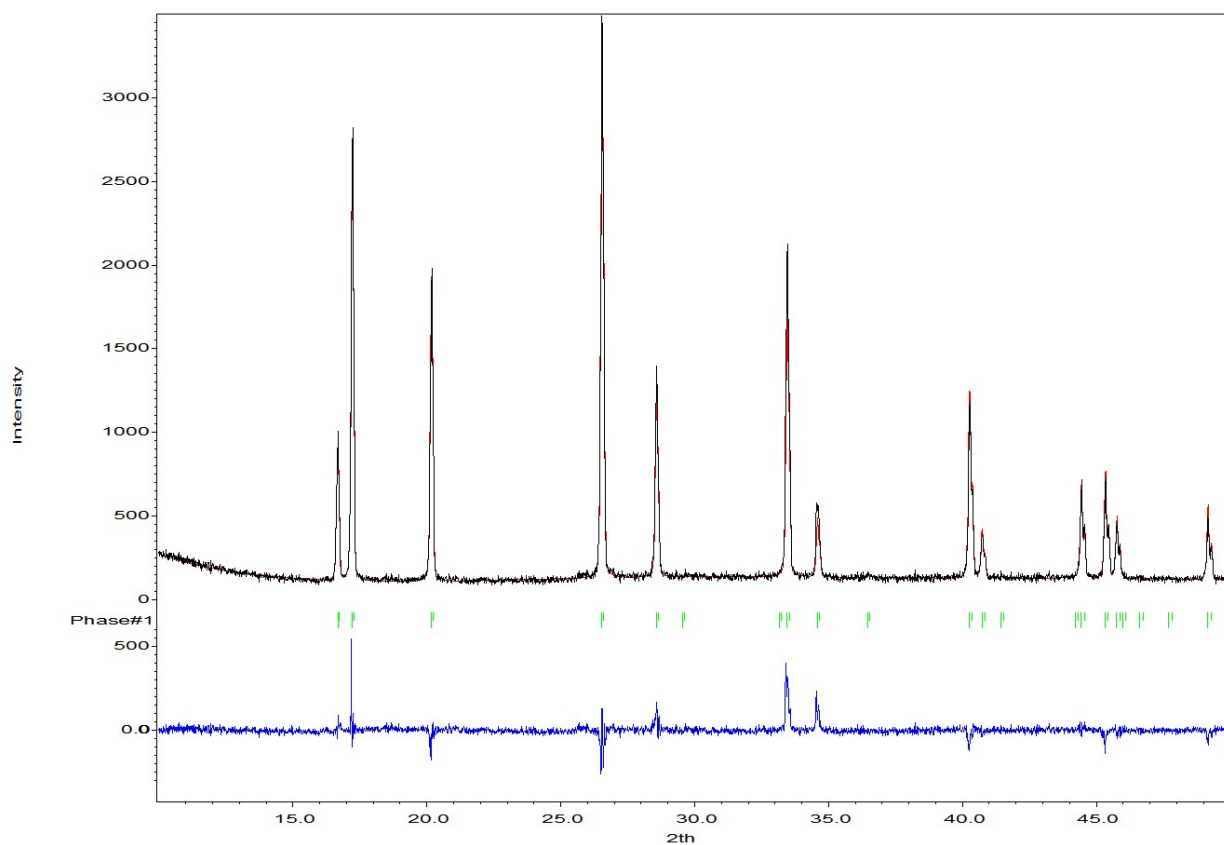

**Fig. S2.** Room-temperature X-ray powder diffraction pattern for  $\text{Ag}_2[\text{B}_{10}\text{H}_{10}]$ . Black: experimental; red: calculated; blue: the difference. Vertical bars show the calculated positions of Bragg peaks.

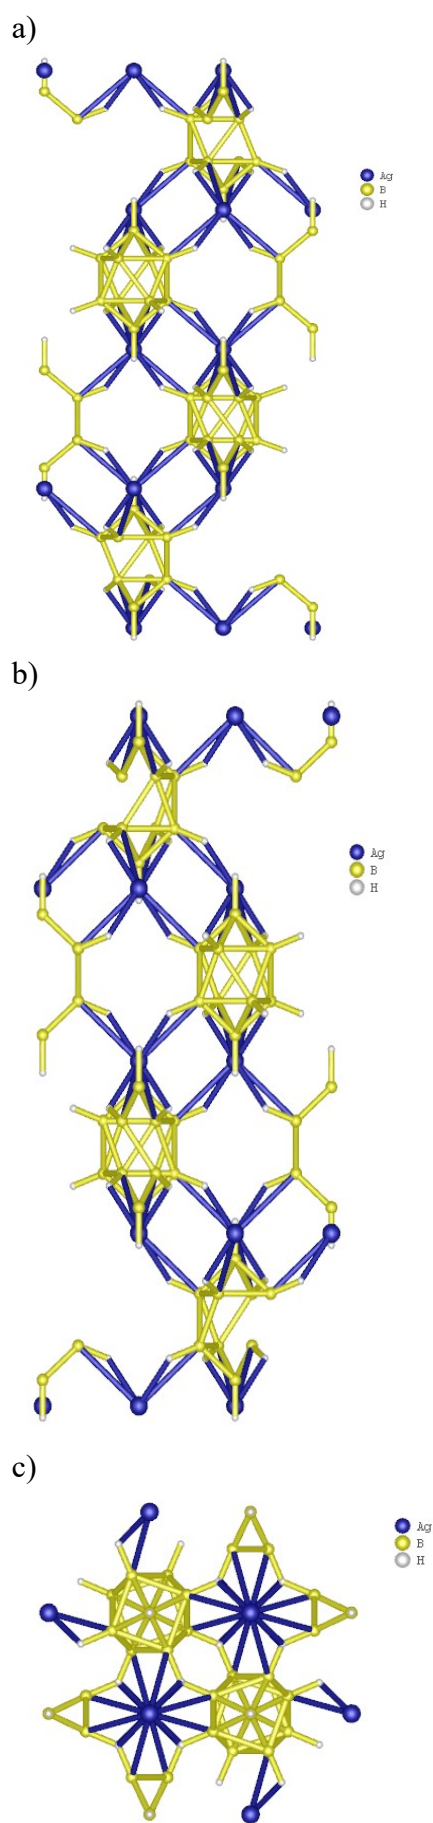

**Fig. S3.** Projections of the crystal structure of  $\text{Ag}_2[\text{B}_{10}\text{H}_{10}]$  along 100 (a), 010 (b), and 001 (c). Data are from cif file 1790981.<sup>S1</sup>

## Expressions used for analysis of the proton spin-lattice relaxation rates

The standard model based on Lorentzian spectral densities<sup>S2,S3</sup> for fluctuating dipole-dipole interactions relates the proton spin-lattice relaxation rate  $R_1^H$  with the parameters of these fluctuations. According to our estimates for the studied compounds, the “rigid-lattice” second moment of the  $^1\text{H}$  NMR line is dominated by the  $^1\text{H} - ^1\text{H}$  and  $^1\text{H} - ^{11}\text{B}$  dipole-dipole interactions, while contributions due to interactions of  $^1\text{H}$  with other nuclear spins can be neglected. In this case, the proton spin-lattice relaxation rate can be written as the sum of the  $^1\text{H} - ^1\text{H}$  and  $^1\text{H} - ^{11}\text{B}$  contributions:

$$R_1^H = \frac{2\Delta M_{HH}\tau_c}{3} \left[ \frac{1}{1 + \omega_H^2\tau_c^2} + \frac{4}{1 + 4\omega_H^2\tau_c^2} \right] + \frac{\Delta M_{HB}\tau_c}{2} \left[ \frac{1}{1 + (\omega_H - \omega_B)^2\tau_c^2} + \frac{3}{1 + \omega_H^2\tau_c^2} + \frac{6}{1 + (\omega_H + \omega_B)^2\tau_c^2} \right] \quad (\text{S1})$$

where  $\omega_H$  and  $\omega_B$  are the resonance frequencies of  $^1\text{H}$  and  $^{11}\text{B}$ , respectively, and  $\Delta M_{HH}$  and  $\Delta M_{HB}$  are the parts of the dipolar second moments due to  $^1\text{H} - ^1\text{H}$  and  $^1\text{H} - ^{11}\text{B}$  interactions that are caused to fluctuate by the reorientational process. The dipolar correlation times  $\tau_c$  are simply related to the corresponding mean residence times  $\tau$  between successive H jumps:  $\tau_c = \tau$  for H – H and H – B interactions within the same reorienting group, and  $\tau_c = \tau/2$  for the interactions between different reorienting groups; the temperature dependence of  $\tau_i$  is governed by the Arrhenius relation:

$$\tau = \tau_0 \exp(E_a / k_B T) \quad . \quad (\text{S2})$$

Since each of the H – H and H – B terms in Equation (S1) exhibits nearly the same temperature and frequency dependence, it is practically impossible to determine the amplitude factors  $\Delta M_{HH}$  and  $\Delta M_{HB}$  *independently* from the fits to the experimental spin-lattice relaxation rate data. For the studied compounds, the estimates of the “rigid-lattice” second moments show that both the H – H and H – B contributions are of the same order of magnitude. Therefore, for the fits we have assumed that  $\Delta M_{HH} = \Delta M_{HB} = \Delta M/2$ .

For  $\text{Ag}_2[\text{B}_{10}\text{H}_{10}]$ , the experimental proton spin-relaxation data suggest the presence of a jump rate distribution, and we have used the model based on a Gaussian distribution of the activation energies.<sup>S4</sup> For this model, the relaxation rate is expressed as

$$R_1^H = \int R_1^H(E_a)G(E_a, \bar{E}_a, \Delta E_a)dE_a, \quad (\text{S4})$$

where  $G(E_a, \bar{E}_a, \Delta E_a)$  is the Gaussian distribution centered on  $\bar{E}_a$  with the dispersion  $\Delta E_a$ , and  $R_1^H(E_a)$  is given by equations (S1) and (S2).

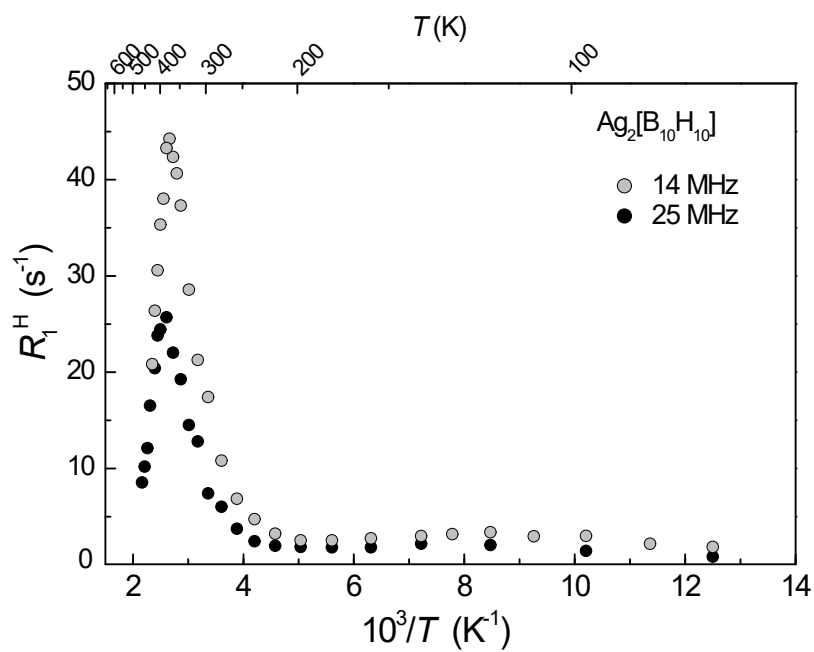

**Fig. S4.** Proton spin-lattice relaxation rates measured at 14 and 25 MHz for  $Ag_2[B_{10}H_{10}]$  at the linear relaxation rate scale.

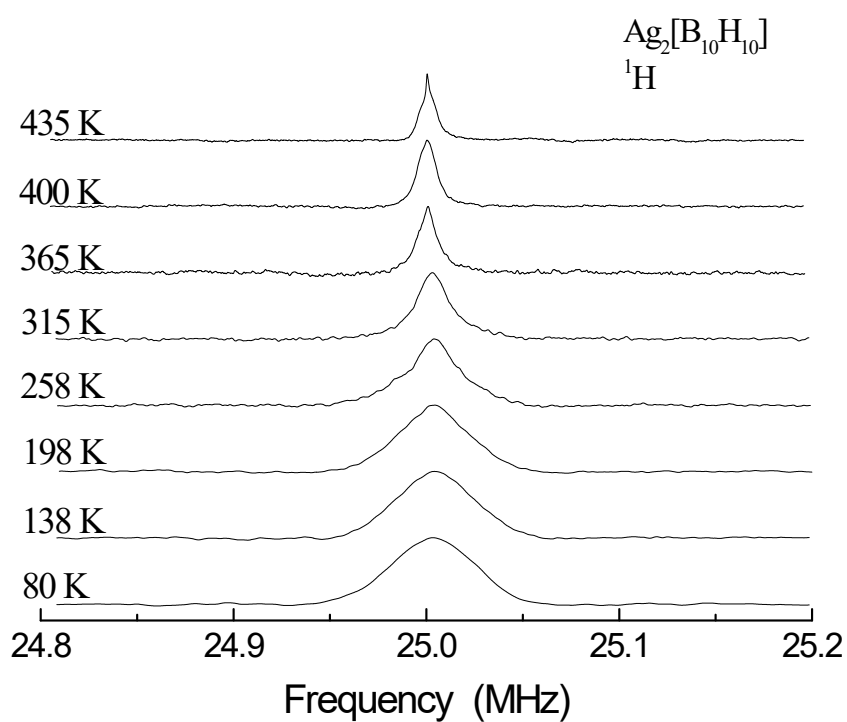

**Fig. S5.** Evolution of the  $^1H$  NMR spectra with temperature.

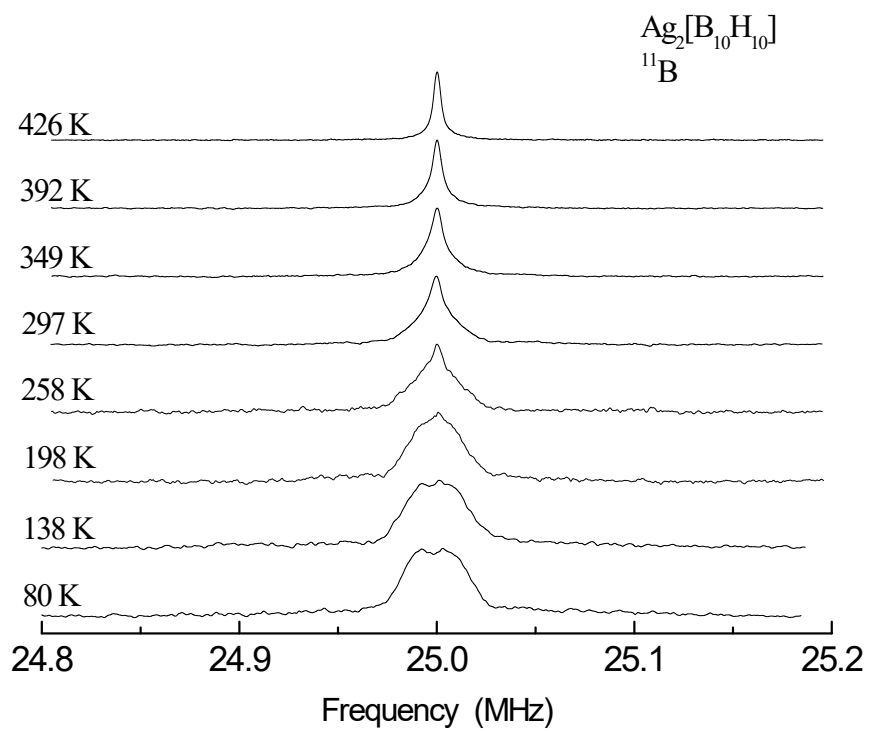

**Fig. S6.** Evolution of the  $^{11}\text{B}$  NMR spectra with temperature.

**Table S2.** Results of the elemental analysis for  $\text{Tl}_2[\text{B}_{10}\text{H}_{10}]$

| Elements      | H    | B     | Tl    |
|---------------|------|-------|-------|
| Calc. (wt. %) | 1.91 | 20.52 | 77.57 |
| Exp. (wt. %)  | 1.89 | 20.48 | 77.51 |

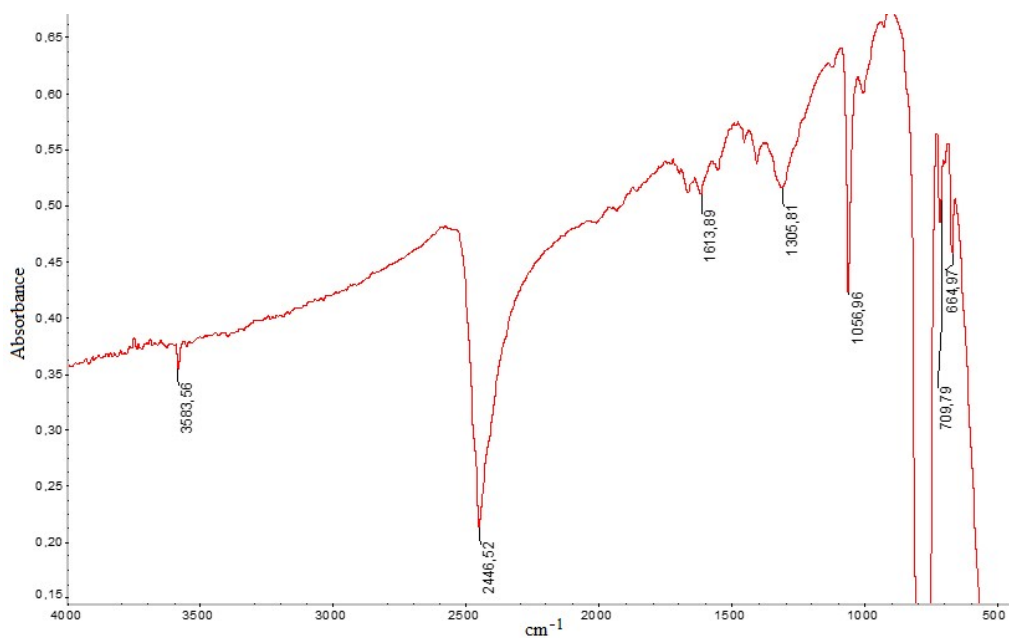

**Fig. S7.** IR spectrum of  $\text{Tl}_2[\text{B}_{10}\text{H}_{10}]$ :  $\nu(\text{BH}) = 2446 \text{ cm}^{-1}$ ,  $\delta(\text{BBH}) = 1057 \text{ cm}^{-1}$ .

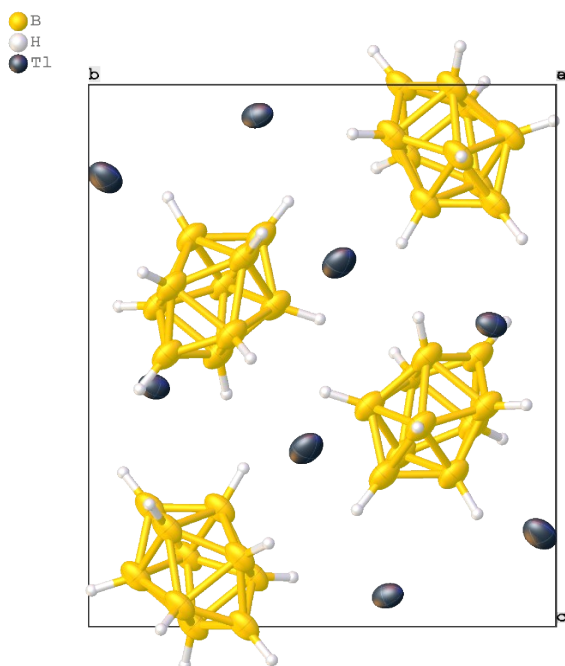

**Fig. S8.** Schematic view of the unit cell of  $\text{Tl}_2[\text{B}_{10}\text{H}_{10}]$  along  $a$  axis.<sup>S5</sup>

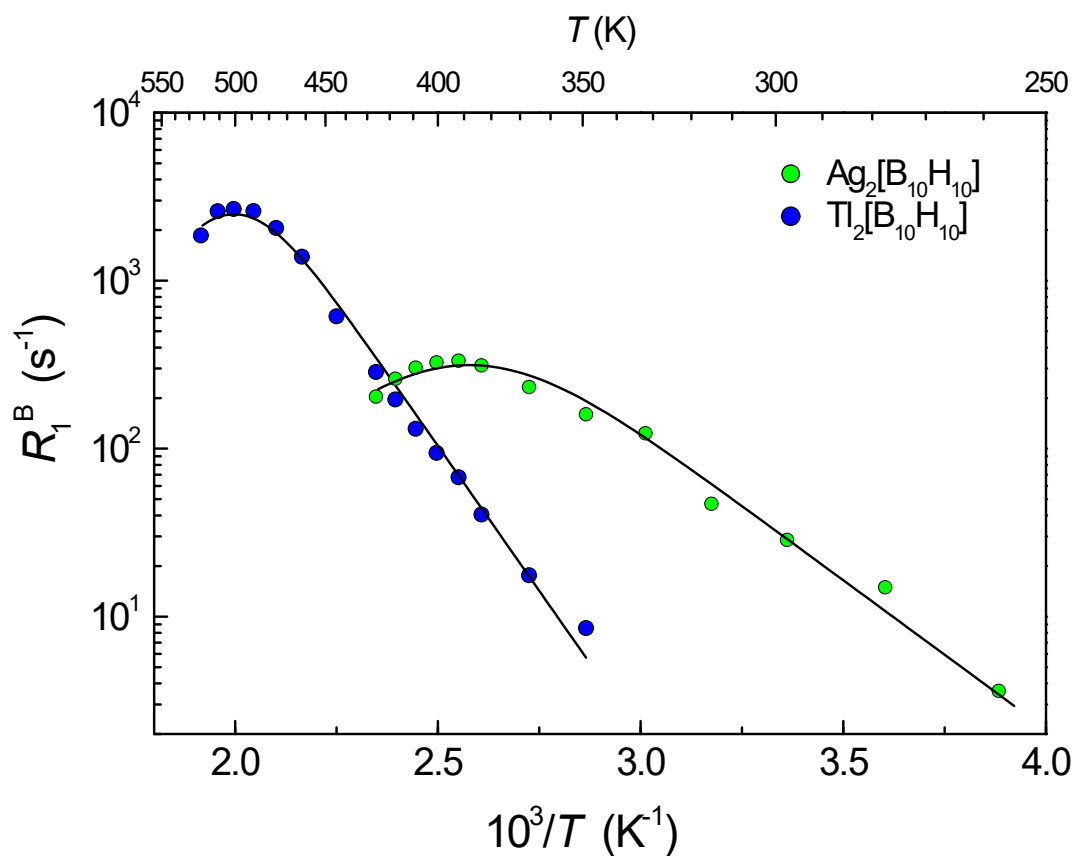

**Fig. S9.** Combined presentation of the  $^{11}\text{B}$  spin-lattice relaxation rates measured at 25 MHz for both  $\text{Ag}_2[\text{B}_{10}\text{H}_{10}]$  and  $\text{Tl}_2[\text{B}_{10}\text{H}_{10}]$  as functions of the inverse temperature. Solid curves show the fits of the standard model to the data.

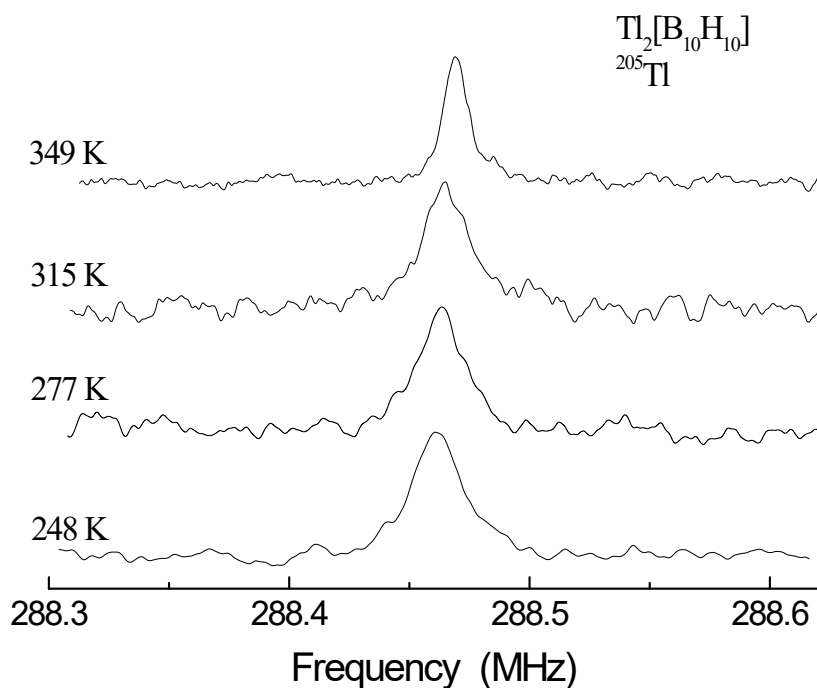

**Fig. S10.** Evolution of  $^{205}\text{Tl}$  NMR spectrum for  $\text{Tl}_2[\text{B}_{10}\text{H}_{10}]$  with temperature.

## References

- S1 M. Paskevicius, B.R.S. Hansen, M. Jørgensen, B. Richter and T.R. Jensen, *Nat. Commun.*, 2017, **8**, 15136.
- S2 N. Bloembergen, E.M. Purcell, R.M. Pound, *Phys. Rev.*, 1948, **73**, 679-712.
- S3 A. Abragam, *The Principles of Nuclear Magnetism*, Clarendon Press, Oxford, 1961.
- S4 J.T. Markert, E.J. Cotts, R.M. Cotts, *Phys. Rev. B*, 1988, **37**, 6446-6452.
- S5 V.V. Avdeeva, A.S. Kubasov, S.E. Korolenko, L.V. Goeva, E.A. Malinina and N.T. Kuznetsov, *Russ. J. Inorg. Chem.*, 2022, **67**, 582-590.
